# Supplementary material for: Role of heme oxygenase-1 in the pathogenesis and tumorigenicity of Kaposi's sarcoma-associated herpesvirus
Source: PubMed Central journal article supplement (PMC4891132; doi:10.18632/oncotarget.7227), 2016-02-07
Supplement: oncotarget-07-10459-s001.pdf [file oncotarget-07-10459-s001.pdf]

## Role of heme oxygenase-1 in the pathogenesis and tumorigenicity of Kaposi's sarcoma-associated herpesvirus

### Supplementary Material

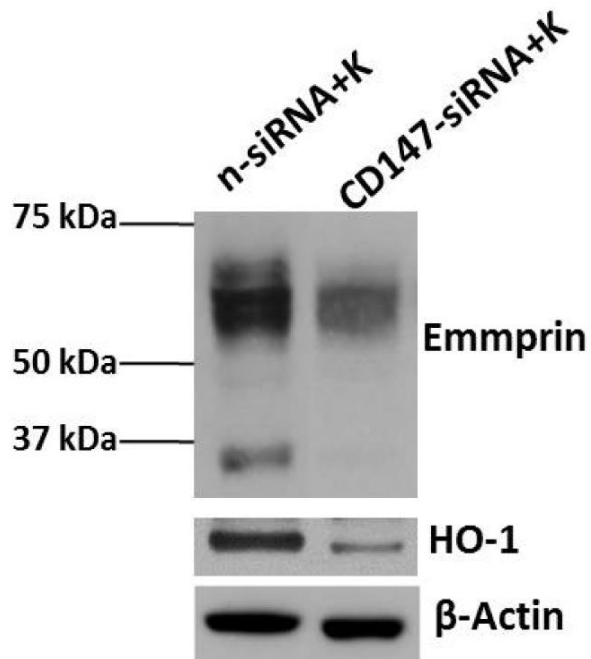

**Figure S1: Targeting CD147 by RNAi reduces HO-1 expression in KSHV-infected HUVEC.** HUVEC were transfected with negative control siRNA (n-siRNA) or *CD147*-siRNA for 48 h, then infected by purified KSHV (MOI ~ 10) for additional 48 h. Protein expression was measured by immunoblots.

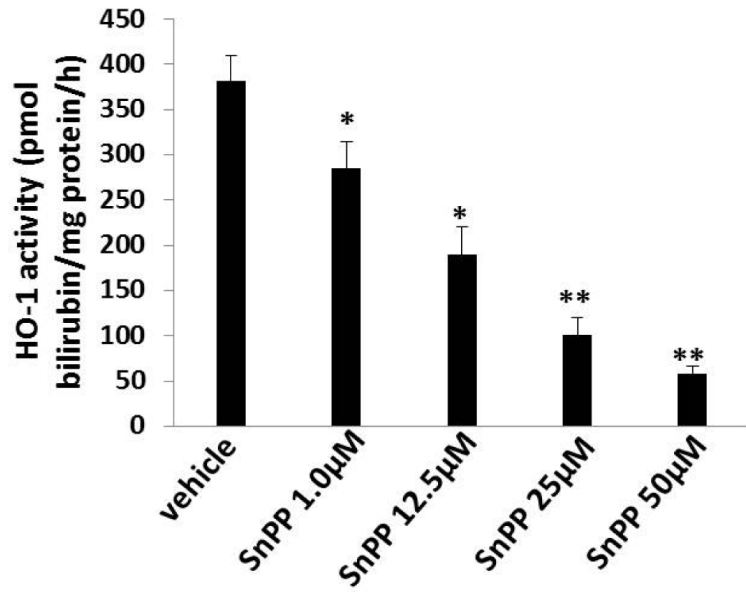

**Figure S2: Measurement of HO activity in TIVE-LTC cell extracts.** TIVE-LTC were incubated with vehicle or indicated concentrations of SnPP for 24 h. HO activity in TIVE-LTC cell extracts was determined by spectrophotometric measurement of bilirubin production as described in the Methods. Error bars represent the S.E.M. for 3 independent experiments. \* =  $p < 0.05$ ; \*\* =  $p < 0.01$ .

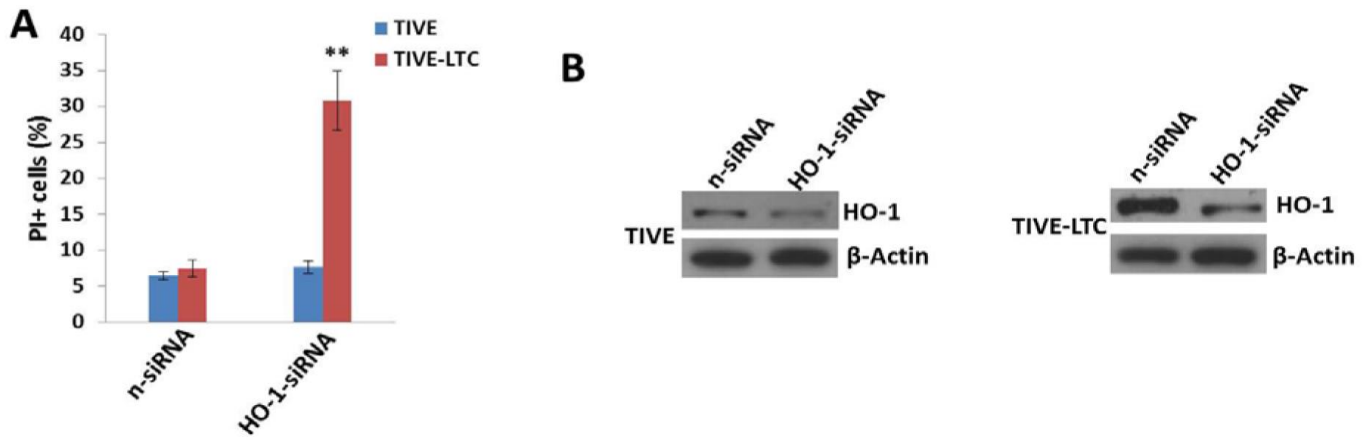

**Figure S3: Targeting HO-1 by RNAi induces TIVE-LTC cell death.** (A) TIVE-LTC and parental TIVE cells were transfected with negative control siRNA (n-siRNA) or *HO-1*-siRNA for 48 h, then cell viability was measured by Annexin V-PI staining and flow cytometry analysis. (B) Protein expression was measured by immunoblots. Error bars represent the S.E.M. for 3 independent experiments. \*\* =  $p < 0.01$ .

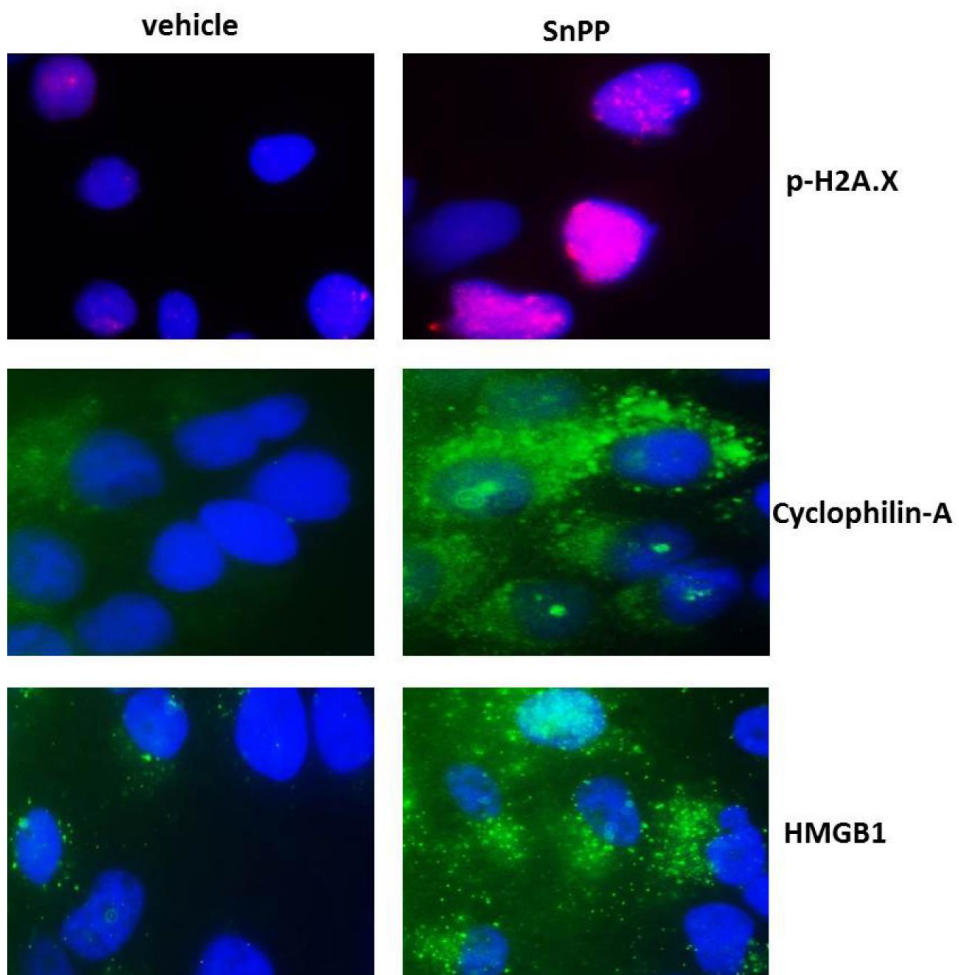

**Figure S4: SnPP treatment increases the expression of DNA damage and necrosis markers within TIVE-LTC.** TIVE-LTC were incubated with vehicle or 50  $\mu$ M of SnPP for 24 h, then protein expression was measured by immunofluorescence and representative images were shown.

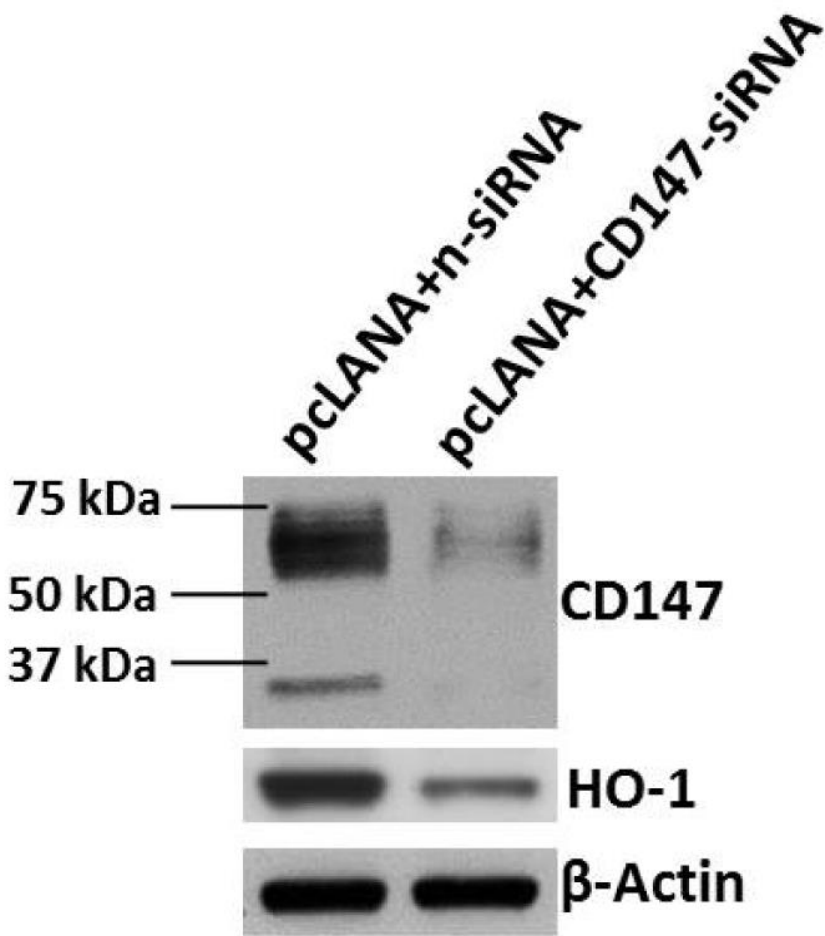

**Figure S5: Targeting CD147 by RNAi reduces HO-1 expression in LANA-transfected HUVEC.** HUVEC were transfected with negative control siRNA (n-siRNA) or *CD147*-siRNA for 48 h, then transfected with LANA construct (pCLANA) for additional 48 h. Protein expression was measured by immunoblots.

Supplemental Table 1. Primer sequences for qRT-PCR in this study.

| Gene           | Sequences (5' → 3')                    |
|----------------|----------------------------------------|
| <i>HO-1</i>    | <i>sense</i> TTTGAGGAGTTGCAGGAGC       |
|                | <i>antisense</i> AGGACCCATCGGAGAAGC    |
| <i>VEGFR1</i>  | <i>sense</i> GACTAGATAGCGTCACCAG       |
|                | <i>antisense</i> AATACTCCGTAAGACCACA   |
| <i>VEGFR2</i>  | <i>sense</i> AAAGGGTGGAGGTGACTG        |
|                | <i>antisense</i> GACATAAATGACCGAGGC    |
| <i>β-actin</i> | <i>sense</i> GGAAATCGTGCGTGACATT       |
|                | <i>antisense</i> GACTCGTCATACTCCTGCTTG |
